# Supplementary material for: Potential Application of Digitally Linked Tuberculosis Diagnostics for Real-Time Surveillance of Drug-Resistant Tuberculosis Transmission: Validation and Analysis of Test Results
Source: PubMed Central journal article supplement (PMC5849801; doi:10.2196/medinform.9309), 2018-02-27
Supplement: medinform_v6i1e12_app7.pdf [file medinform_v6i1e12_app7.pdf]

# 1Multimedia Appendices

2

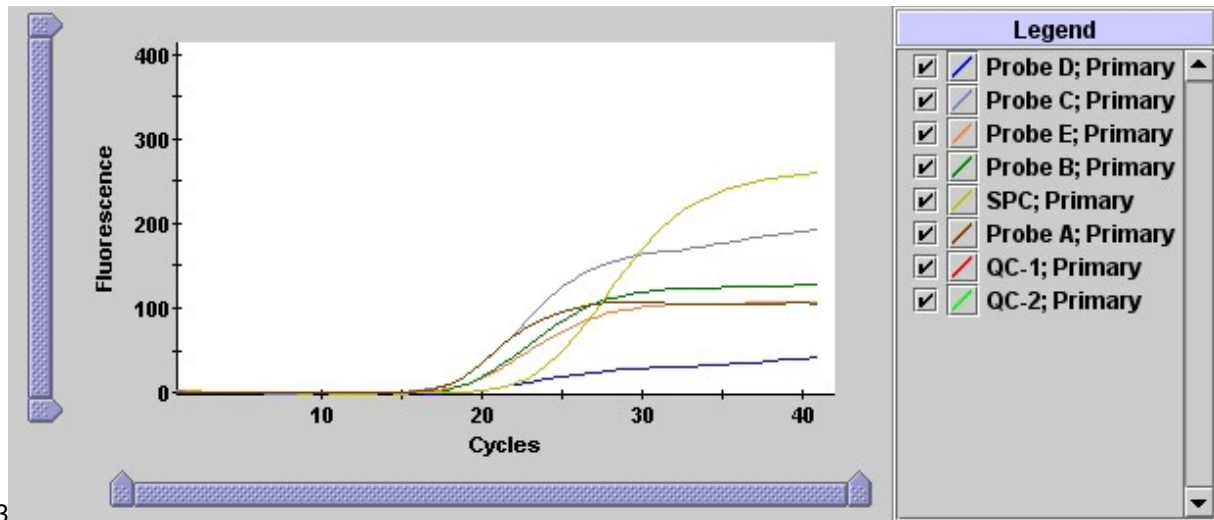

3

4Multimedia Appendix 6. Ct curve of mutation H445R captured by probe D with single purine  
5transition substitution type, Ct 27.5 and  $\Delta$ Ct 8.2.
